# Supplementary material for: Highly Efficient Temperature Inducible CRISPR-Cas9 Gene Targeting in Drosophila suzukii
Source: MDPI journal article supplement (doi:10.3390/ijms22136724), 2021-06-23
Supplement: s1 [file s1]

# Highly Efficient Temperature Inducible CRISPR-Cas9 Gene Targeting in *Drosophila suzukii*

Ying Yan<sup>1,\*</sup>, Yukino Kobayashi<sup>1</sup>, Cong Huang<sup>2,3</sup>, Bo Liu<sup>2,3</sup>, Wanqiang Qian<sup>2,3</sup>, Fanghao Wan<sup>2,3</sup> and Marc F. Schetelig<sup>1</sup>

<sup>1</sup> Department of Insect Biotechnology in Plant Protection, Institute for Insect Biotechnology, Justus-Liebig-University Giessen, Winchesterstraße 2, 35394 Giessen, Germany; Yukino.Kobayashi@ernaehrung.uni-giessen.de (Y.K.); Marc.Schetelig@agrar.uni-giessen.de (M.F.S.)

<sup>2</sup> Shenzhen Branch, Guangdong Laboratory of Lingnan Modern Agriculture, Agricultural Genomics Institute at Shenzhen, Chinese Academy of Agricultural Sciences, Shenzhen 518120, China; huangcong16@163.com (C.H.); liubo03@caas.cn (B.L.); qianwanqiang@caas.cn (W.Q.); wanfanghao@caas.cn (F.W.)

<sup>3</sup> Genome Analysis Laboratory of the Ministry of Agriculture and Rural Affairs, Agricultural Genomics Institute at Shenzhen, Chinese Academy of Agricultural Sciences, Shenzhen 518120, China; huangcong16@163.com (C.H.); liubo03@caas.cn (B.L.); qianwanqiang@caas.cn (W.Q.); wanfanghao@caas.cn (F.W.)

\* Correspondence: Ying.Yan@agrar.uni-giessen.de

Supplemental tables S1–4 and figures S1–4.

**Table S1. Primer sequences**

| Primer No. | Primer Name     | Primer Sequence                                                                      |
|------------|-----------------|--------------------------------------------------------------------------------------|
| P212       | Bsp119I attP_F  | ACTTTCGAAACTAGTACTGACGGAC                                                            |
| P213       | Bsp119I attP_R  | TCATTTCGAACTGTACTAGTCGCGCTC                                                          |
| MFS10      | pBac 5' R       | ACGACCGCGTGAGTCAAAATGACG                                                             |
| MFS17      | EGFP 3' F       | CAGAACACCCCCATCGGCGACGGC                                                             |
| P109       | SV40 3' F       | CAGCCATACCACATTTGTAGAGG                                                              |
| P106       | EGFP RT-F       | CAAAGACCCCAACGAGAAGC                                                                 |
| P108       | EGFP RT-R       | GTCCATGCCGAGAGTGATCC                                                                 |
| P1489      | Cas9 RT-F       | GCCACCGTGCGGAAAGTGCTGAGC                                                             |
| P1490      | Cas9 RT-R       | CGGTGGGGCTGTCTGAAGCCGCCG                                                             |
| P740       | DsTBP RT-F      | CCACGGTGAATCTGTGCT                                                                   |
| P741       | DsTBP RT-R      | GGAGTCGTCCTCGCTCTT                                                                   |
| P898       | DsY ORF-F       | ATGTTTCAGGACAAAGGATGGATCCTGGTGA                                                      |
| P899       | DsY ORF-R       | TTAACCCTGATGCTGGTGGTGCCACCAGCCAGA                                                    |
| P145       | EGFP genotype_F | ACTTAATCGCCTTGCAGCACATCC                                                             |
| P55        | EGFP genotype_R | TGTGATCGCGCTTCTCGTT                                                                  |
| P1720      | DsY genotype_F  | CTGACTGGTTCGCCGGAGCTG                                                                |
| P1808      | DsY genotype_R  | CCAGCCACATTGAAGTCACCCCTC                                                             |
| P1172      | sgRNA_EGFP2b-F  | GAAATTAATACGACTCACTATAGGCTGAAGCACTGCACGCCGTGTTT<br>TAGAGCTAGAAATAGC                  |
| P1686      | sgRNA_Ds_Y_E2-F | GAAATTAATACGACTCACTATAGGTCGACCTGACCACCGATACGGTT<br>TTAGAGCTAGAAATAGC                 |
| P369       | sgRNA_UNI-R     | AAAAGCACCGACTCGGTGCCACTTTTTCAAGTTGATAACGGACTAGC<br>CTTATTTTAACTTGCTATTTCTAGCTCTAAAAC |

**Table S2. Germline transmission of EGFP mutations under different heat-shock conditions**

| <b>Injection mix (HS condition)<sup>a</sup></b> | <b>Founder G<sub>0</sub><sup>b</sup></b> | <b>G<sub>1</sub> mutants</b> | <b>Total No. of G<sub>1</sub></b> | <b>Inheritance from G<sub>0</sub> to G<sub>1</sub><sup>c</sup></b> | <b>Average inheritance</b> | <b>No. of detected mutations<sup>d</sup></b> |
|-------------------------------------------------|------------------------------------------|------------------------------|-----------------------------------|--------------------------------------------------------------------|----------------------------|----------------------------------------------|
| V23 plasmid (Non-HS)                            | F18                                      | 42                           | 74                                | 42/74 (56.8%)                                                      | 56.8%                      | 1                                            |
| EGFP-2b (Non-HS)                                | M2                                       | 154                          | 315                               | 154/315 (48.9%)                                                    | 39.4%                      | 2                                            |
|                                                 | M6                                       | 82                           | 313                               | 82/313 (26.2%)                                                     |                            | 1                                            |
|                                                 | M7                                       | 84                           | 85                                | 84/85 (98.8%)                                                      |                            | 1                                            |
|                                                 | F4                                       | 13                           | 143                               | 13/143 (9.1%)                                                      |                            | 1                                            |
|                                                 | F5                                       | 6                            | 43                                | 6/43 (14.0%)                                                       |                            | 1                                            |
| EGFP-2b (HS-after 20 h)                         | M2                                       | 83                           | 125                               | 83/125 (66.4%)                                                     | 78.3%                      | 2                                            |
|                                                 | M3                                       | 7                            | 195                               | 7/195 (3.6%)                                                       |                            | 1                                            |
|                                                 | F2                                       | 8                            | 8                                 | 8/8 (100%)                                                         |                            | 2                                            |
|                                                 | F3                                       | 83                           | 83                                | 83/83 (100%)                                                       |                            | 2                                            |
|                                                 | F5                                       | 25                           | 25                                | 25/25 (100%)                                                       |                            | 1                                            |
|                                                 | F9                                       | 15                           | 15                                | 15/15 (100%)                                                       |                            | 2                                            |
| EGFP-2b (HS-parents)                            | M2                                       | 193                          | 203                               | 193/203 (95.1%)                                                    | 92.0%                      | 2                                            |
|                                                 | M4                                       | 169                          | 180                               | 169/180 (89.0%)                                                    |                            | 1                                            |

<sup>a</sup> The composition of the injection mix and the heat-shock (HS) conditions are the same as in Table. 1

<sup>b</sup> The G<sub>0</sub> flies that transmitted Cas9-derived mutant alleles to the G<sub>1</sub> generation.

<sup>c</sup> The number of mutant G<sub>1</sub> offspring relative to the total number of G<sub>1</sub> offspring.

<sup>d</sup> The number of verified mutations in the target EGFP region from 2-5 mutant (non-fluorescent) G<sub>1</sub> flies from each G<sub>0</sub> cross.

**Table S3. Injection and crossing scheme to obtain *D. suzukii* yellow mutants ( $y^-$ )**

| Injection mix<br>(HS condition) <sup>a</sup> | Injected<br>embryos | Hatched<br>larvae | Mosaic G <sub>0</sub><br>adults <sup>b</sup> | G <sub>0</sub> group<br>crosses <sup>c</sup> | Ratio of $y^-$<br>males in G <sub>1</sub> <sup>d</sup> | Ratio of $y^{+/+}$<br>females in G <sub>1</sub> <sup>d</sup> | G <sub>0</sub> founders <sup>e</sup> |
|----------------------------------------------|---------------------|-------------------|----------------------------------------------|----------------------------------------------|--------------------------------------------------------|--------------------------------------------------------------|--------------------------------------|
| Ds_y_E2<br>(HS-after 20 h)                   | 435                 | 50                | 5.3%<br>(2/38)                               | M <sub>1-5</sub>                             | 2.6%<br>(14/536)                                       | 1.9%<br>(10/536)                                             | 2.6%<br>(1/38)                       |
|                                              |                     |                   |                                              | M <sub>6-10</sub>                            | 0                                                      | 0                                                            |                                      |
|                                              |                     |                   |                                              | M <sub>11-15</sub>                           | 0                                                      | 0                                                            |                                      |
|                                              |                     |                   |                                              | M <sub>16-20</sub>                           | 0                                                      | 0                                                            |                                      |
|                                              |                     |                   |                                              | M <sub>20-25</sub>                           | 0                                                      | 0                                                            |                                      |
|                                              |                     |                   |                                              | M <sub>26-27</sub>                           | 0                                                      | 0                                                            |                                      |
|                                              |                     |                   |                                              | F <sub>1-11</sub>                            | 0                                                      | 0                                                            |                                      |

<sup>a</sup> The DsY\_E2 is the synthesized gRNA (200 ng/μL) that targeting the second exon (E2) of *DsY* gene, and the heat-shock (HS) condition is the same as in Table. 1.

<sup>b</sup> The number of mosaic individuals relative to the total number of G<sub>0</sub> adults.

<sup>c</sup> The G<sub>0</sub> males or females were group crossed to wildtype (WT) partners (15 WT females were used for each G<sub>0</sub> male group and 11 WT males were used for the G<sub>0</sub> female group).

<sup>d</sup> The number of *yellow* mutant flies relative to the total number of G<sub>1</sub> offspring.

<sup>e</sup> The number of G<sub>0</sub> founder flies that predicted by the number of mutation events relative to the number of G<sub>0</sub> adults.

**Table S4. Lethality tests for *DsY* males over multiple generations**

| Flies                           | Generation (G) <sup>a</sup> | No. of newly emerged flies <sup>b</sup> | No. of flies after 1 day | No. of flies after 2 day | No. of flies after 10 day |
|---------------------------------|-----------------------------|-----------------------------------------|--------------------------|--------------------------|---------------------------|
| <i>DsY<sup>-/+</sup></i> female | G2                          | 7                                       | 7                        | 7                        | 7                         |
| <i>DsY<sup>-</sup></i> male     | G2                          | 15                                      | 5                        | 0                        |                           |
|                                 | G3                          | 15                                      | 2                        | 0                        |                           |
|                                 | G4                          | 15                                      | 1                        | 0                        |                           |
|                                 | G5                          | 15                                      | 3                        | 0                        |                           |
|                                 | G6                          | 15                                      | 1                        | 0                        |                           |
|                                 | G7                          | 15                                      | 1                        | 0                        |                           |
|                                 | G8                          | 15                                      | 2                        | 0                        |                           |
|                                 | G9                          | 15                                      | 1                        | 0                        |                           |
|                                 | G10                         | 15                                      | 2                        | 0                        |                           |
|                                 | G11                         | 15                                      | 3                        | 0                        |                           |
|                                 | G12                         | 15                                      | 1                        | 0                        |                           |
|                                 | G13                         | 15                                      | 1                        | 0                        |                           |
|                                 | G14                         | 15                                      | 1                        | 0                        |                           |
|                                 | G15                         | 15                                      | 2                        | 0                        |                           |
|                                 | G16                         | 15                                      | 1                        | 0                        |                           |
|                                 | G17                         | 15                                      | 1                        | 0                        |                           |
|                                 | G18                         | 15                                      | 1                        | 0                        |                           |
|                                 | G19                         | 15                                      | 3                        | 0                        |                           |
|                                 | G20                         | 15                                      | 2                        | 0                        |                           |
| <i>DsY<sup>-/+</sup></i> female | G20                         | 15                                      | 15                       | 14                       | 13                        |
| WT male                         |                             | 15                                      | 15                       | 15                       | 11                        |

<sup>a</sup> The *yellow* mutant heterozygous females (*DsY<sup>-/+</sup>*) were crossed with wildtype (WT) males in each generation for population maintenance due to the lethality in *yellow* mutant males (*DsY<sup>-</sup>*).

<sup>b</sup> The newly emerged flies (<4 hours) were placed into fresh food vials, and the number (No.) of flies were counted every day until day 10 or all flies died.

|                                                                                                                                                                                                                                                                                                                                                                                                                                                                                                      |                                                                                                                                                                                                                                                         |
|------------------------------------------------------------------------------------------------------------------------------------------------------------------------------------------------------------------------------------------------------------------------------------------------------------------------------------------------------------------------------------------------------------------------------------------------------------------------------------------------------|---------------------------------------------------------------------------------------------------------------------------------------------------------------------------------------------------------------------------------------------------------|
| <p><b>sgRNA-EGFP1</b></p> <p>Target Sequence: CTCGCCCTTGCTCACCATGG</p> <p>Protospacer Adjacent Motif (PAM): TGG</p> <p>Doench (2014) Activity Score: 0.027</p> <p>Zhang (2013) Specificity Score: 99.40%</p> <p># Off-target Sites: 3 (0 in CDS)</p> <p>Off-target #1 Score: 1.00%</p> <p>Sequence (#1): CTCGTCCTTGCCCGCCATGGTGG</p> <p>Off-target #2 Score: 1.00%</p> <p>Sequence (#2): CTCGTCCTTGCCCGCCATGGTGG</p> <p>Off-target #3 Score: 1.00%</p> <p>Sequence (#3): CTCGTCCTTGCCCGCCATGGTGG</p> | <p><b>sgRNA-EGFP2</b></p> <p>Target Sequence: GTCGCCACCATGGTGAGCAA</p> <p>Protospacer Adjacent Motif (PAM): GGG</p> <p>Doench (2014) Activity Score: 0.701</p> <p>Zhang (2013) Specificity Score: 100.00%</p> <p># Off-target Sites: 0 (0 in CDS)</p>   |
| <p><b>sgRNA-EGFP2b</b></p> <p>Target Sequence: GCTGAAGCACTGCACGCCGT</p> <p>Protospacer Adjacent Motif (PAM): AGG</p> <p>Doench (2014) Activity Score: 0.329</p> <p>Zhang (2013) Specificity Score: 100.00%</p> <p># Off-target Sites: 0 (0 in CDS)</p>                                                                                                                                                                                                                                               | <p><b>sgRNA-Ds_y_E2</b></p> <p>Target Sequence: TCGACCTGACCACCGATACG</p> <p>Protospacer Adjacent Motif (PAM): AGG</p> <p>Doench (2014) Activity Score: 0.684</p> <p>Zhang (2013) Specificity Score: 100.00%</p> <p># Off-target Sites: 0 (0 in CDS)</p> |

**Figure 1. Off-target analysis for the gRNAs.** Assessment of potential off-target effects of each gRNA was performed using the “Find CRISPR sites” tool of the Geneious Software Package 11.0.6 (Kearse et al., 2012) based on the *D. suzukii* genome (Dsuzukii\_v1\_scaffolds.fa.gz) (Chiu et al., 2013). The activity of gRNA was predicted through its sequence features based on the model proposed by Doench et al. (2014), and scores are between 0 and 1, with a higher score denoting higher expected activity. The specificity of gRNA was scored based on the Zhang (2013) method by searching for CRISPR sites with 3' PAMs, and scores are between 0 and 100, with a higher score meaning better specificity and less off-target activity. The numbers of the potential off-target sequences in the target genome and coding region sequence (CDS) were indicated. Each off-target sequence was given a score based on how similar it was to the spacer sequence of gRNAs. A higher score (%) indicated a higher similarity to the original target site and a higher likelihood to cause off-target mutations.

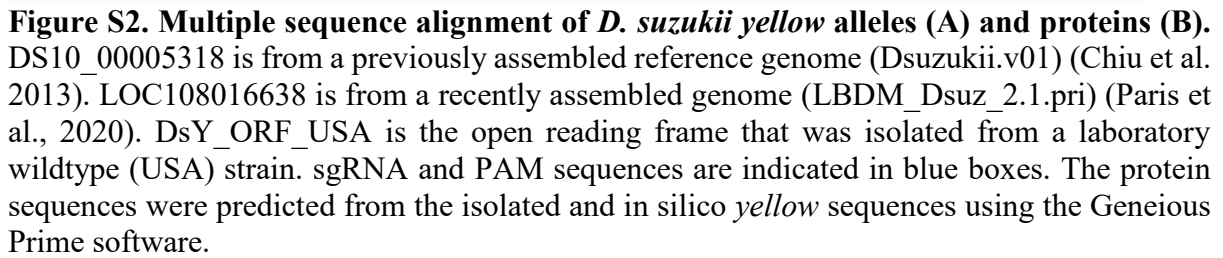

|                         |                                                                                   |     |
|-------------------------|-----------------------------------------------------------------------------------|-----|
| Drosophila sechellia    | MFQDKGWILVT-LITLVTP---SWAAYKLQERYSNWQLDFAFPNTRLKQDALASGDYIPQNALPVGVEHFGNRLFVTV    | 75  |
| Drosophila simulans     | MFQDKGWILVT-LITLVTP---SWAAYKLQERYSNWQLDFAFPNTRLKQDALASGDYIPQNALPVGVEHFGNRLFVTV    | 75  |
| Drosophila melanogaster | MFQDKGWILVT-LITLVTP---SWAAYKLQERYSNWQLDFAFPNTRLKQDALASGDYIPQNALPVGVEHFGNRLFVTV    | 75  |
| Drosophila erecta       | MFQDKGWILVT-LITLVTP---SWAAYKLQERYSNWQLDFAFPNTRLKQDALASGDYIPQNALPVGVEHFGNRLFVTV    | 75  |
| Drosophila yakuba       | MFQDKGWILVT-LITLVTP---SWAAYKLQERYSNWQLDFAFPNTRLKQDALASGDYIPQNALPVGVEHFGNRLFVTV    | 75  |
| Drosophila takahashii   | MFQDKGWILVT-LITLVTP---SWAAYKLQERYSNWQLDFAFPNTRLKQDALASGDYIPQNALPVGVEHFGNRLFVTV    | 79  |
| Drosophila suzukii      | MFQDKGWILVT-LITLVTP---SWAAYKLQERYSNWQLDFAFPNTRLKQDALASGDYIPQNALPVGVEHFGNRLFVTV    | 75  |
| Drosophila biarmipes    | MFQDKGWILVT-LITLVTP---SWAAYKLQERYSNWQLDFAFPNTRLKQDALASGDYIPQNALPVGVEHFGNRLFVTV    | 76  |
| Drosophila elegans      | MFQDKGWILVT-LITLVTP---SWAAYKLQERYSNWQLDFAFPNTRLKQDALASGDYIPQNALPVGVEHFGNRLFVTV    | 75  |
| Drosophila rhopalaoa    | MFQDKGW6Lvt L6 L p sWAAYKLQERYsWnQLDFAFPN RLK QALASGDY6PQN LPVGEVHFgnRLFVTV       | 76  |
| Drosophila sechellia    | RWRDGIPTATLTYYINMDRSLTGSPELIYPYDWRSTAGDCANSITTAIRIKVDECGRWLVDLTGTVGIGNTTNNPCPYAVN | 155 |
| Drosophila simulans     | RWRDGIPTATLTYYINMDRSLTGSPELIYPYDWRSTAGDCANSITTAIRIKVDECGRWLVDLTGTVGIGNTTNNPCPYAVN | 155 |
| Drosophila melanogaster | RWRDGIPTATLTYYINMDRSLTGSPELIYPYDWRSTAGDCANSITTAIRIKVDECGRWLVDLTGTVGIGNTTNNPCPYAVN | 155 |
| Drosophila erecta       | RWRDGIPTATLTYYINMDRSLTGSPELIYPYDWRSTAGDCANSITTAIRIKVDECGRWLVDLTGTVGIGNTTNNPCPYAVN | 155 |
| Drosophila yakuba       | RWRDGIPTATLTYYINMDRSLTGSPELIYPYDWRSTAGDCANSITTAIRIKVDECGRWLVDLTGTVGIGNTTNNPCPYAVN | 155 |
| Drosophila takahashii   | RWRDGIPTATLTYYINMDRSLTGSPELIYPYDWRSTAGDCANSITTAIRIKVDECGRWLVDLTGTVGIGNTTNNPCPYAVN | 159 |
| Drosophila suzukii      | RWRDGIPTATLTYYINMDRSLTGSPELIYPYDWRSTAGDCANSITTAIRIKVDECGRWLVDLTGTVGIGNTTNNPCPYAVN | 155 |
| Drosophila biarmipes    | RWRDGIPTATLTYYINMDRSLTGSPELIYPYDWRSTAGDCANSITTAIRIKVDECGRWLVDLTGTVGIGNTTNNPCPYAVN | 156 |
| Drosophila elegans      | RWRDGIPTATLTYYINMDRSLTGSPELIYPYDWRSTAGDCANSITTAIRIKVDECGRWLVDLTGTVGIGNTTNNPCPYAVN | 155 |
| Drosophila rhopalaoa    | RWRDGIPTATLTYYINMDRSLTGSPELIYPYDWRSTAGDCANSITTAIRIKVDECGRWLVDLTGTVGIGNTTNNPCPYAVN | 156 |
| Drosophila sechellia    | VFDLTTDTRIRRYELPGVDNTPNTFIANIAVDIGKNCDDAYAYFADELGYGLIAYSWEIKNKSWRFSAHSYFFPDPLRGDF | 235 |
| Drosophila simulans     | VFDLTTDTRIRRYELPGVDNTPNTFIANIAVDIGKNCDDAYAYFADELGYGLIAYSWEIKNKSWRFSAHSYFFPDPLRGDF | 235 |
| Drosophila melanogaster | VFDLTTDTRIRRYELPGVDNTPNTFIANIAVDIGKNCDDAYAYFADELGYGLIAYSWEIKNKSWRFSAHSYFFPDPLRGDF | 235 |
| Drosophila erecta       | VFDLTTDTRIRRYELPGVDNTPNTFIANIAVDIGKNCDDAYAYFADELGYGLIAYSWEIKNKSWRFSAHSYFFPDPLRGDF | 235 |
| Drosophila yakuba       | VFDLTTDTRIRRYELPGVDNTPNTFIANIAVDIGKNCDDAYAYFADELGYGLIAYSWEIKNKSWRFSAHSYFFPDPLRGDF | 235 |
| Drosophila takahashii   | VFDLTTDTRIRRYELPGVDNTPNTFIANIAVDIGKNCDDAYAYFADELGYGLIAYSWEIKNKSWRFSAHSYFFPDPLRGDF | 239 |
| Drosophila suzukii      | VFDLTTDTRIRRYELPGVDNTPNTFIANIAVDIGKNCDDAYAYFADELGYGLIAYSWEIKNKSWRFSAHSYFFPDPLRGDF | 235 |
| Drosophila biarmipes    | VFDLTTDTRIRRYELPGVDNTPNTFIANIAVDIGKNCDDAYAYFADELGYGLIAYSWEIKNKSWRFSAHSYFFPDPLRGDF | 236 |
| Drosophila elegans      | VFDLTTDTRIRRYELPGVDNTPNTFIANIAVDIGKNCDDAYAYFADELGYGLIAYSWEIKNKSWRFSAHSYFFPDPLRGDF | 235 |
| Drosophila rhopalaoa    | VFDLTTDTRIRRYELPGVDNTPNTFIANIAVDIGKNCDDAYAYFADELGYGLIAYSWEIKNKSWRFSAHSYFFPDPLRGDF | 236 |
| Drosophila sechellia    | NVAGINFQWGEEGI FGMSLSPISRSDGYRTLYFSPLASHRQFAVSTRILRDETRTDSYHDFVALDERGPNSTHTSRVMSD | 315 |
| Drosophila simulans     | NVAGINFQWGEEGI FGMSLSPISRSDGYRTLYFSPLASHRQFAVSTRILRDETRTDSYHDFVALDERGPNSTHTSRVMSD | 315 |
| Drosophila melanogaster | NVAGINFQWGEEGI FGMSLSPISRSDGYRTLYFSPLASHRQFAVSTRILRDETRTDSYHDFVALDERGPNSTHTSRVMSD | 315 |
| Drosophila erecta       | NVAGINFQWGEEGI FGMSLSPISRSDGYRTLYFSPLASHRQFAVSTRILRDETRTDSYHDFVALDERGPNSTHTSRVMSD | 315 |
| Drosophila yakuba       | NVAGINFQWGEEGI FGMSLSPISRSDGYRTLYFSPLASHRQFAVSTRILRDETRTDSYHDFVALDERGPNSTHTSRVMSD | 315 |
| Drosophila takahashii   | NVAGINFQWGEEGI FGMSLSPISRSDGYRTLYFSPLASHRQFAVSTRILRDETRTDSYHDFVALDERGPNSTHTSRVMSD | 319 |
| Drosophila suzukii      | NVAGINFQWGEEGI FGMSLSPISRSDGYRTLYFSPLASHRQFAVSTRILRDETRTDSYHDFVALDERGPNSTHTSRVMSD | 315 |
| Drosophila biarmipes    | NVAGINFQWGEEGI FGMSLSPISRSDGYRTLYFSPLASHRQFAVSTRILRDETRTDSYHDFVALDERGPNSTHTSRVMSD | 316 |
| Drosophila elegans      | NVAGINFQWGEEGI FGMSLSPISRSDGYRTLYFSPLASHRQFAVSTRILRDETRTDSYHDFVALDERGPNSTHTSRVMSD | 315 |
| Drosophila rhopalaoa    | NVAGINFQWGEEGI FGMSLSPISRSDGYRTLYFSPLASHRQFAVSTRILRDETRTDSYHDFVALDERGPNSTHTSRVMSD | 316 |
| Drosophila sechellia    | DGIELFNLIDQN-----AKPQTSWASSPPPP--SRTYLPAA--NSGNVVS                                | 327 |
| Drosophila simulans     | DGIELFNLIDQNAGVGCWHSMPYSPQFHGIVDRDDVGLVFPADVVIDENKNVWVLSDRMPVFLSLDLYSDTNFRITYAP   | 395 |
| Drosophila melanogaster | DGIELFNLIDQNAGVGCWHSMPYSPQFHGIVDRDDVGLVFPADVVIDENKNVWVLSDRMPVFLSLDLYSDTNFRITYAP   | 395 |
| Drosophila erecta       | DGIELFNLIDQNAGVGCWHSMPYSPQFHGIVDRDDVGLVFPADVVIDENKNVWVLSDRMPVFLSLDLYSDTNFRITYAP   | 395 |
| Drosophila yakuba       | DGIELFNLIDQNAGVGCWHSMPYSPQFHGIVDRDDVGLVFPADVVIDENKNVWVLSDRMPVFLSLDLYSDTNFRITYAP   | 395 |
| Drosophila takahashii   | DGIELFNLIDQNAGVGCWHSMPYSPQFHGIVDRDDVGLVFPADVVIDENKNVWVLSDRMPVFLSLDLYSDTNFRITYAP   | 399 |
| Drosophila suzukii      | DGIELFNLIDQNAGVGCWHSMPYSPQFHGIVDRDDVGLVFPADVVIDENKNVWVLSDRMPVFLSLDLYSDTNFRITYAP   | 395 |
| Drosophila biarmipes    | DGIELFNLIDQNAGVGCWHSMPYSPQFHGIVDRDDVGLVFPADVVIDENKNVWVLSDRMPVFLSLDLYSDTNFRITYAP   | 396 |
| Drosophila elegans      | DGIELFNLIDQNAGVGCWHSMPYSPQFHGIVDRDDVGLVFPADVVIDENKNVWVLSDRMPVFLSLDLYSDTNFRITYAP   | 395 |
| Drosophila rhopalaoa    | DGIELFNLIDQNAGVGCWHSMPYSPQFHGIVDRDDVGLVFPADVVIDENKNVWVLSDRMPVFLSLDLYSDTNFRITYAP   | 396 |
| Drosophila sechellia    | -----AKPQTSWASSPPPP--SRTYLPAA--NSGNVVS                                            | 355 |
| Drosophila simulans     | LATLIENTVCDLRNNAYGPPNTVSIKQ-AVLPMPGPLYTKQYRPVLPQKQTSWASSPPPP--SRTYLPAA--NSGNVVS   | 470 |
| Drosophila melanogaster | LATLIENTVCDLRNNAYGPPNTVSIKQ-AVLPMPGPLYTKQYRPVLPQKQTSWASSPPPP--SRTYLPAA--NSGNVVS   | 470 |
| Drosophila erecta       | LATLIENTVCDLRNNAYGPPNTVSIKQ-AVLPMPGPLYTKQYRPVLPQKQTSWASSPPPP--SRTYLPAA--NSGNVVS   | 470 |
| Drosophila yakuba       | LATLIENTVCDLRNNAYGPPNTVSIKQ-TVLPVGPPLYTKQYRPVLPQKQTSWASSPPPP--SRTYLPAA--NSGNVVS   | 470 |
| Drosophila takahashii   | LATLIENTVCDLRNNAYGPPNTVSIKQAAALPIGPPPLYTKQYRPVLPQKQTSWASSPPPP--SRTYLPAGGNPNVVS    | 477 |
| Drosophila suzukii      | LATLIENTVCDLRNNAYGPPNAVSIKQ-PALPIGPPSYNKNYRPALPQKQTSWASSPPPP--SRTYLPAA--NAGNVVS   | 471 |
| Drosophila biarmipes    | LATLIENTVCDLRNNAYGPPNAVSIKQ-PALPIGPPSYNKNYRPALPQKQTSWASSPPPP--SRTYLPAA--SSGNVVS   | 470 |
| Drosophila elegans      | LATLIENTVCDLRNNAYGPPNTVSIKQ-AALPIGPPPLYTKQYRPVLPQKQTSWASSPPPP--SRTYLPAA--NPGNVVS  | 474 |
| Drosophila rhopalaoa    | LATLIENTVCDLRNNAYGPPNTVSIKQ-AALPIGPPPLYTKQYRPVLPQKQTSWASSPPPP--SRTYLPAA--NPGNVVS  | 471 |
| Drosophila sechellia    | latlientvcdlrnna gppn vsipkq lp gpp ytkqyr lpqKQTSW SSPPPP SRTYLPAA n GNVVS       |     |
| Drosophila simulans     | SISVSTNSVGPAGVEVPKAYIFNQHNGINYETSGPHLFPTHQPAQPGVQDGLKTYVNARQSGWWHHQHOG            | 426 |
| Drosophila melanogaster | SISVSTNSVGPAGVEVPKAYIFNQHNGINYETSGPHLFPTHQPAQPGVQDGLKTYVNARQSGWWHHQHOG            | 541 |
| Drosophila erecta       | SISVSTNSVGPAGVEVPKAYIFNQHNGINYETSGPHLFPTHQPAQPGVQDGLKTYVNARQSGWWHHQHOG            | 541 |
| Drosophila yakuba       | SISVSTNSVGPAGVEVPKAYIFNQHNGINYETSGPHLFPTHQPAQPGVQDGLKTYVNARQSGWWHHQHOG            | 541 |
| Drosophila takahashii   | SISVSTNSVGPAGVEVPKAYIFNQHNGINYETSGPHLFPTHQPAQPGVQDGLKTYVNARQSGWWHHQHOG            | 547 |
| Drosophila suzukii      | SISVSTNSVGPAGVEVPKAYIFNQHNGINYETSGPHLFPTHQPAQPGVQDGLKTYVNARQSGWWHHQHOG            | 541 |
| Drosophila biarmipes    | SISVSTNSVGPAGVEVPKAYIFNQHNGINYETSGPHLFPTHQPAQPGVQDGLKTYVNARQSGWWHHQHOG            | 544 |
| Drosophila elegans      | SISVSTNSVGPAGVEVPKAYIFNQHNGINYETSGPHLFPTHQPAQPGVQDGLKTYVNARQSGWWHHQHOG            | 540 |
| Drosophila rhopalaoa    | SISVSTNSVGPAGVEVPKAYIFNQHNGINYETSGPHLFPTHQPAQPGVQDGLKTYVNARQSGWWHHQHOG            | 541 |

**Figure S3. Multiple sequence alignment of Yellow from ten *Drosophila* species.** The alignment was performed by MAFFT v7. Aligned sequences were depicted with ESPrnt 3.0 server (<http://esprnt.ibcp.fr/ESPrnt/cgi-bin/ESPrnt.cgi>). The conserved Major Royal Jelly Protein (MRJP; pfam03022) domain is highlighted in yellow. Dsec: *Drosophila sechellia* (XP\_002040222.1), Dsim: *Drosophila simulans* (XP\_016037524.1), Dmel: *Drosophila melanogaster* (NP\_476792.1), Dere: *Drosophila erecta* (XP\_001982384.1), Dyak: *Drosophila yakuba* (XP\_002099667.1), Dtak: *Drosophila takahashii* (XP\_016995421.1), Dsuz: *Drosophila suzukii* (this study), Dbia: *Drosophila biarmipes* (XP\_016948849.1), Dele: *Drosophila elegans* (XP\_017114065.1), Drho: *Drosophila rhopalaoa* (XP\_016982272.1).



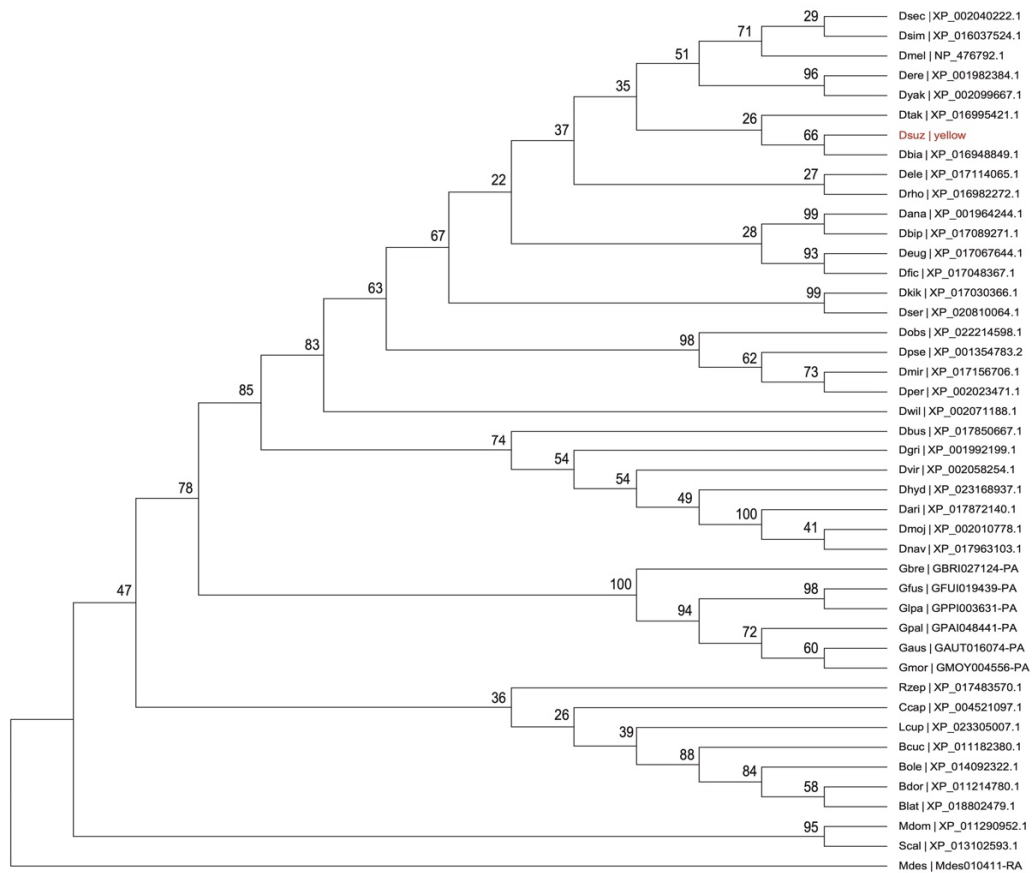

**Figure S4. Phylogenetic tree of Yellow from 44 insect species.** The neighbor-joining phylogenetic tree was constructed using the aligned sequences by the ClustalW algorithm in MEGA6 with the JTT substitution model. A bootstrap method of 1000 replicates was used to evaluate the branch strength of the model. The *D. suzukii* Yellow from this study is indicated in red, and the GenBank accession numbers for Yellow from other species are shown. Dsec: *Drosophila sechellia*, Dsim: *Drosophila simulans*, Dmel: *Drosophila melanogaster*, Dere: *Drosophila erecta*, Dyak: *Drosophila yakuba*, Dtak: *Drosophila takahashii*, Dsuz: *Drosophila suzukii*, Dbia: *Drosophila biarmipes*, Dele: *Drosophila elegans*, Drho: *Drosophila rhopalosa*, Dana: *Drosophila ananassae*, Dbip: *Drosophila bipectinata*, Deug: *Drosophila eugracilis*, Dfic: *Drosophila ficusphila*, Dkik: *Drosophila kikkawai*, Dser: *Drosophila serrata*, Dobs: *Drosophila obscura*, Dpse: *Drosophila pseudoobscura*, Dmir: *Drosophila miranda*, Dper: *Drosophila persimilis*, Dwill: *Drosophila willistoni*, Dbus: *Drosophila busckii*, Dgri: *Drosophila grimshawi*, Dvir: *Drosophila virilis*, Dhyd: *Drosophila hydei*, Dari: *Drosophila arizonae*, Dmoj: *Drosophila mojavensis*, Dnav: *Drosophila navojoa*, Gbre: *Glossina brevipalpis*, Gfus: *Glossina fuscipes*, Glpa: *Glossina palpalis*, Gpal: *Glossina pallidipes*, Gaus: *Glossina austeni*, Gmor: *Glossina morsitans*, Rzep: *Rhagoletis zephyria*, Ccap: *Ceratitis capitata*, Lcup: *Lucilia cuprina*, Bcuc: *Bactrocera cucurbitae*, Bole: *Bactrocera oleae*, Bdor: *Bactrocera dorsalis*, Blat: *Bactrocera latifrons*, Mdom: *Musca domestica*, Scal: *Stomoxys calcitrans*, Mdes: *Mayetiola destructor*.
